# Supplementary material for: The Impact of Scholastic Factors on Physical Activity Levels during the COVID-19 Lockdown: A Prospective Study on Adolescents from Bosnia and Herzegovina
Source: MDPI journal article supplement (doi:10.3390/children8100877), 2021-10-01
Supplement: s1 [file s1]

## Supplementary Materials

**Table S1.** Characteristics of the participants (F – frequencies, % - percentages).

|                     | F   | %    |
|---------------------|-----|------|
| Gender              |     |      |
| Male                | 284 | 53.1 |
| Female              | 246 | 45.9 |
| Missing             | 5   | 0.9  |
| Grade point average |     |      |
| Excellent           | 205 | 38.7 |
| Very good           | 200 | 38.3 |
| Good                | 104 | 19.4 |
| Sufficient          | 7   | 1.31 |
| Insufficient        | 7   | 3.18 |
| Missing             | 2   | 0.37 |
| School absences     |     |      |
| < 5 hours           | 229 | 42.8 |
| 5-10 hours          | 208 | 38.9 |
| 11-20 hours         | 80  | 15.0 |
| > 20 hours          | 18  | 3.36 |
| Missing             | 0   | 0    |
| Unexcused absences  |     |      |
| < 5 hours           | 380 | 71.0 |
| 6-10 hours          | 98  | 18.3 |
| 11-15 hours         | 24  | 4.5  |
| 16-20 hours         | 15  | 2.8  |
| > 20 hours          | 18  | 3.4  |
| Missing             | 0   | 0    |
| Behavioral grade    |     |      |
| Excellent           | 456 | 85.2 |
| Very good           | 52  | 9.8  |
| Proper              | 16  | 3.0  |
| Poor                | 11  | 2.1  |
| Missing             | 0   | 0    |
| Sport participation |     |      |
| Never been involved | 145 | 27.1 |
| < 1 year            | 107 | 20   |
| 2-5 years           | 154 | 28.8 |
| > 5 years           | 129 | 24.1 |
| Missing             | 0   | 0    |
| Parental education  |     |      |
| Elementary          | 40  | 7.5  |
| High school         | 388 | 75.5 |
| College degree      | 60  | 11.2 |
| University degree   | 47  | 8.8  |
| Missing             | 0   | 0    |
| Parental conflict   |     |      |
| Never               | 213 | 39.8 |
| Rarely              | 204 | 38.1 |
| From time to time   | 105 | 19.6 |
| Regularly           | 13  | 2.4  |
